# Supplementary material
Source: publisher figshare collection journal article supplement (https://rs.figshare.com/ndownloader/files/13193933)
Supplement: Supplementary file 1 [file 13193933]

**Electronic supplementary material**

Paper titled: “***Simultaneous Measurements of Three-Dimensional Trajectories and Wingbeat Frequencies of Birds in the Field***”

**Authors:** *Hangjian Ling1, Guillam E. Mclvor2, Geoff Nagy3, Sepehr MohaimenianPour3, Richard T. Vaughan3, Alex Thornton2, Nicholas T. Ouellette1*

1Department of Civil and Environmental Engineering, Stanford University, Stanford, CA USA;

2Center for Ecology and Conservation, University of Exeter, Penryn, UK;

3School of Computing Science, Simon Fraser University, Burnaby, Canada

Accepted for publication at ***Journal of Royal Society Interface***


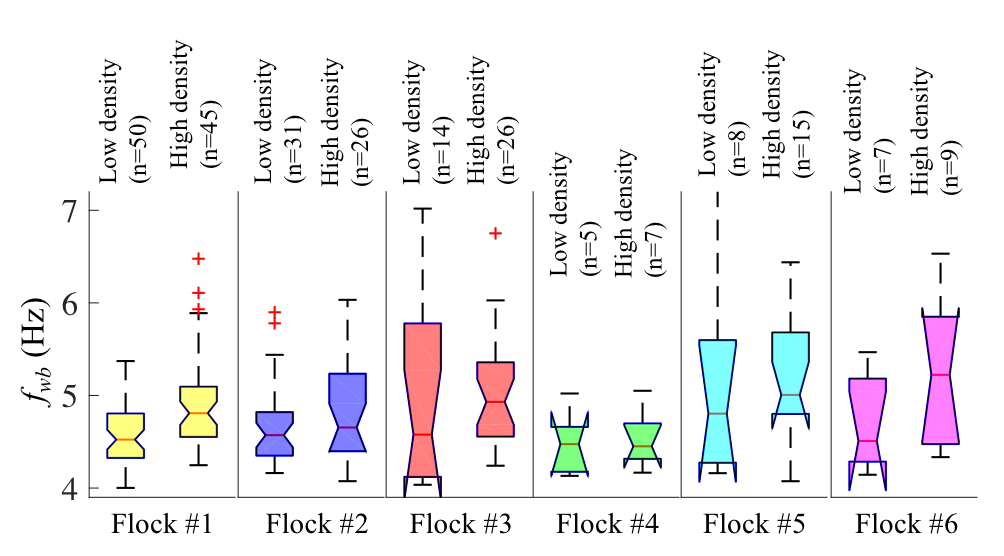


Figure S1: Box plots of wingbeat frequency averaged over flapping modes after excluding rooks (that is, birds with mean wingbeat frequency<4 Hz). For each flock, we selected birds that are flying in low density regions defined by *N3m* < mean(*N3m*)-std(*N3m*), and that are flying in high density regions defined as *N3m* > mean(*N3m*) + std(*N3m*).
